# Supplementary material
Source: HighWire-hosted journal article supplement (https://bmjmedicine.bmj.com/content/suppl/2022/12/12/10.1136.bmjmed-2022-000227)
Supplement: bmjmed-2022-000227supp001_data_supplement.pdf [file bmjmed-2022-000227supp001_data_supplement.pdf]

## Appendix 1: Cost Analysis

## 1. Pretomanid

|                  | Drug<br>[NDC]                                                                                                                                                                                                                                          | Dosage & Administration                                                                                                                                                                                                                                                                                      | Unit Cost (WAC, \$)                                                                                                                                                                                                                                                                                                                   | Total Cost (WAC, \$)                                                                                                                                                                                                                                                                   |
|------------------|--------------------------------------------------------------------------------------------------------------------------------------------------------------------------------------------------------------------------------------------------------|--------------------------------------------------------------------------------------------------------------------------------------------------------------------------------------------------------------------------------------------------------------------------------------------------------------|---------------------------------------------------------------------------------------------------------------------------------------------------------------------------------------------------------------------------------------------------------------------------------------------------------------------------------------|----------------------------------------------------------------------------------------------------------------------------------------------------------------------------------------------------------------------------------------------------------------------------------------|
| Study Antibiotic | Pretomanid<br>[49502-0476-26]                                                                                                                                                                                                                          | <p>200 mg daily orally for 26 weeks, <i>in combination with</i>:</p> <ul style="list-style-type: none"> <li>Linezolid 1,200 mg daily orally for up to 26 weeks</li> <li>Bedaquiline 400 mg orally once daily for 2 weeks followed by 200 mg 3 times per week for 24 weeks for a total of 26 weeks</li> </ul> | <ul style="list-style-type: none"> <li>Pretomanid<br/>19.78/200 mg tablet<br/>(Package Size: 26 tablets)</li> <li>Linezolid<br/>2.43/600 mg tablet<br/>(Package Size: 20 tablets)</li> <li>Bedaquiline:<br/>159.57/100 mg tablet<br/>(Package Size: 188 tablets)</li> </ul>                                                           | <ul style="list-style-type: none"> <li>Pretomanid: 3,599.96</li> <li>Linezolid: 884.52</li> <li>Bedaquiline: 31,914.00</li> </ul> <p><b>36,398.48</b></p>                                                                                                                              |
| Comparator       | <p>Isoniazid (INH)<br/>[10135-0584-01]</p> <p>Rifampin (RIF)<br/>[00904-5282-61]</p> <p>Pyrazinamide (PZA)<br/>[61748-0012-05]</p> <p>&amp;</p> <p>Ethambutol (EMB)<br/>[68850-0012-02]</p>                                                            | <p><u>Intensive Phase</u>: 300 mg INH, 600 mg RIF, 1500 mg PZA, and 1200 EMB once daily for 8 weeks</p> <p><u>Continuation Phase</u>: 300 mg INH and 600 mg RIF once daily for 18 weeks</p>                                                                                                                  | <ul style="list-style-type: none"> <li>INH<br/>0.16040/300 mg tablet<br/>(Package Size: 100 tablets)</li> <li>RIF<br/>1.10550/300 mg tablet<br/>(Package Size: 100 tablets)</li> <li>PZA:<br/>4.86616/500 mg tablet<br/>(Package Size: 500 tablets)</li> <li>EMB<br/>0.78000/400 mg tablet<br/>(Package Size: 100 tablets)</li> </ul> | <p><b>Intensive</b></p> <ul style="list-style-type: none"> <li>INH: 8.98</li> <li>RIF: 123.82</li> <li>PZA: 817.51</li> <li>EMB: 131.04</li> </ul> <p><b>Continuation</b></p> <ul style="list-style-type: none"> <li>INH: 20.21</li> <li>RIF: 278.59</li> </ul> <p><b>1,380.15</b></p> |
| Cost Factor      | 26.37                                                                                                                                                                                                                                                  |                                                                                                                                                                                                                                                                                                              |                                                                                                                                                                                                                                                                                                                                       |                                                                                                                                                                                                                                                                                        |
| Notes            | <ul style="list-style-type: none"> <li>Total costs are calculated based on unit cost rather than package cost.</li> <li>Additional Reference NDCs               <ul style="list-style-type: none"> <li>Linezolid: 72606-0001-07</li> </ul> </li> </ul> |                                                                                                                                                                                                                                                                                                              |                                                                                                                                                                                                                                                                                                                                       |                                                                                                                                                                                                                                                                                        |

|  |                                                                                                                                                                                                                                                                                                                                                                                                                                                                                                                                            |
|--|--------------------------------------------------------------------------------------------------------------------------------------------------------------------------------------------------------------------------------------------------------------------------------------------------------------------------------------------------------------------------------------------------------------------------------------------------------------------------------------------------------------------------------------------|
|  | <ul style="list-style-type: none"><li>o Bedaquiline: 59676-0701-01</li><li>o Isoniazid: 10135-0584-01</li><li>o Rifampin: 00904-5282-61</li><li>o Pyrazinamide: 61748-0012-05</li><li>o Ethambutol: 68850-0012-02</li></ul> <p>▪ <b>Costs as of Date</b></p> <ul style="list-style-type: none"><li>o Pretomanid: 11.07.2019</li><li>o Linezolid: 10.08.2019</li><li>o Bedaquiline: 04.19.2013</li><li>o Isoniazid: 05.01.2015</li><li>o Rifampin: 09.12.2016</li><li>o Pyrazinamide: 02.28.2017</li><li>o Ethambutol: 11.01.2016</li></ul> |
|--|--------------------------------------------------------------------------------------------------------------------------------------------------------------------------------------------------------------------------------------------------------------------------------------------------------------------------------------------------------------------------------------------------------------------------------------------------------------------------------------------------------------------------------------------|

2. Imipenem-Cilastatin-Relebactam

|                  | Drug<br>[NDC]                                                                                                                                                                                                                                                                                                                                                                                                                                                                                                                                                                                                                                                                                    | Dosage & Administration                                                                                                                         | Unit Cost (WAC, \$)                                                                                                                                                                                                       | Total Cost (WAC, \$) |
|------------------|--------------------------------------------------------------------------------------------------------------------------------------------------------------------------------------------------------------------------------------------------------------------------------------------------------------------------------------------------------------------------------------------------------------------------------------------------------------------------------------------------------------------------------------------------------------------------------------------------------------------------------------------------------------------------------------------------|-------------------------------------------------------------------------------------------------------------------------------------------------|---------------------------------------------------------------------------------------------------------------------------------------------------------------------------------------------------------------------------|----------------------|
| Study Antibiotic | Imipenem-Cilastatin-Relebactam<br>[00006-3856-02]                                                                                                                                                                                                                                                                                                                                                                                                                                                                                                                                                                                                                                                | [All Indications] 1.25 g by IV infusion over 30 minutes, every 6 hours, for 4-14 days                                                           | 267.50/1.25 g vial<br>(Package Size: 25 vials)                                                                                                                                                                            | 4,280 - 14,980       |
| Comparator       | Imipenem-Cilastatin (IMI)<br>[63323-0349-93]<br>(Study PN003, PN004)                                                                                                                                                                                                                                                                                                                                                                                                                                                                                                                                                                                                                             | 500 mg IV infusion every 6 hours, for 4 – 14 days                                                                                               | [Imipenem-Cilastatin]<br>6.50000/unit of 250-250 mg powder for solution<br>(Package Size: 25 units of 250-250 mg)                                                                                                         | 104.00 – 364.00      |
|                  | Colistimethate Sodium (CMS)<br>[25021-0159-10]<br><br>&<br><br>Imipenem-Cilastatin (IMI)<br>[63323-0349-93]<br>(Study PN013)                                                                                                                                                                                                                                                                                                                                                                                                                                                                                                                                                                     | Loading dose of colistimethate sodium (300 mg), followed by 300 mg CMS every 12 hours and 500 mg IMI IV infusion every 6 hours, for 4 – 14 days | [Colistimethate Sodium]<br>24.00000/unit of 150 mg powder for solution<br>(Package Size: 1 unit)<br><br>[Imipenem-Cilastatin]<br>6.50000/unit of 250-250 mg powder for solution<br>(Package Size: 25 units of 250-250 mg) | 536.00 – 1,756.00    |
| Cost Factor      | IMI<br>41.15<br><br>IMI+CMS<br>7.99, 8.53                                                                                                                                                                                                                                                                                                                                                                                                                                                                                                                                                                                                                                                        |                                                                                                                                                 |                                                                                                                                                                                                                           |                      |
| Notes            | <ul style="list-style-type: none"><li>Imipenem-Cilastatin-Relebactam is available in a combination of 500 mg imipenem, 500 mg cilastatin, and 250 mg relebactam.</li><li>Cost ranges, and cost factor ranges, reflect cost for the shortest and longest course of treatment indicated.</li><li>Additional Reference NDCs<ul style="list-style-type: none"><li>Imipenem-cilastatin (250-250 mg): 63323-0349-93</li><li>Colistimethate sodium: 25021-0159-10</li></ul></li><li>Costs as of Date<ul style="list-style-type: none"><li>Imipenem-Cilastatin-Relebactam: 01.06.2020</li><li>Imipenem-cilastatin (250-250 mg): 06.16.2016</li><li>Colistimethate sodium: 12.15.2014</li></ul></li></ul> |                                                                                                                                                 |                                                                                                                                                                                                                           |                      |

## 3. Lefamulin

|                  | Drug<br>[NDC]                                                                                                                                                                                                                              | Dosage & Administration                                                                                                  | Unit Cost (WAC, \$)                                                                                                       | Total Cost (WAC, \$)                       |
|------------------|--------------------------------------------------------------------------------------------------------------------------------------------------------------------------------------------------------------------------------------------|--------------------------------------------------------------------------------------------------------------------------|---------------------------------------------------------------------------------------------------------------------------|--------------------------------------------|
| Study Antibiotic | Lefamulin<br>[72000-0110-30,<br>72000-0120-06]                                                                                                                                                                                             | 150 mg every 12 hours by IV infusion over 60 minutes for<br>5 – 7 days<br>OR<br>600 mg tablets every 12 hours for 5 days | 6.83/mL<br>(Package Size: 6 vials, 15 mL each,<br>at 10 mg/mL)<br><br>137.50/600 mg tablet<br>(Package Size: 30 tablets)  | IV: 1,024.50 - 1,434.50<br>Oral: 1,375.00  |
| Comparator       | Moxifloxacin<br>[67457-0323-25, 65862-<br>0603-30]                                                                                                                                                                                         | [For CABP] 400 mg moxifloxacin orally OR by IV infusion<br>once daily for 7 – 14 days                                    | 0.18/mL<br>(Package Size: 12 units of 250 mL<br>at 400 mg/250 mL)<br><br>2.94/400 mg tablet<br>(Package Size: 30 tablets) | IV: 315.00 – 630.00<br>Oral: 20.58 – 41.16 |
| Cost Factor      | IV: 3.25, 2.28<br>Oral: 66.81, 33.41                                                                                                                                                                                                       |                                                                                                                          |                                                                                                                           |                                            |
|                  |                                                                                                                                                                                                                                            |                                                                                                                          |                                                                                                                           |                                            |
| Notes            | <div>▪ Costs as of Date</div> <div><div>○ Lefamulin (IV 72000-0110-30, tablet 72000-0120-06): 09.01.2019</div><div>○ Moxifloxacin (IV, 67457-0323-25): 10.03.2017</div><div>○ Moxifloxacin (tablet, 65862-0603-30): 05.15.2018</div></div> |                                                                                                                          |                                                                                                                           |                                            |

## 4. Rifamycin

|                  | Drug<br>[NDC]                                                                                                                                                                                                                                                                                                                                                                                                                                                             | Dosage & Administration                                            | Unit Cost (WAC, \$)                               | Total Cost (WAC, \$) |
|------------------|---------------------------------------------------------------------------------------------------------------------------------------------------------------------------------------------------------------------------------------------------------------------------------------------------------------------------------------------------------------------------------------------------------------------------------------------------------------------------|--------------------------------------------------------------------|---------------------------------------------------|----------------------|
| Study Antibiotic | Rifamycin<br>[71068-0001-10]                                                                                                                                                                                                                                                                                                                                                                                                                                              | 388 mg twice a day for 3 days                                      | 14.67/194 mg tablet<br>(Package Size: 12 tablets) | 176.04               |
| Comparator       | Ciprofloxacin<br>[55111-0127-01]                                                                                                                                                                                                                                                                                                                                                                                                                                          | [For Traveler’s Diarrhea] 500 mg orally twice daily for 5 – 7 days | 0.19/500 mg tablet<br>(Package Size: 100 tablets) | 1.9 – 2.66           |
| Cost Factor      | 92.65, 66.18                                                                                                                                                                                                                                                                                                                                                                                                                                                              |                                                                    |                                                   |                      |
|                  |                                                                                                                                                                                                                                                                                                                                                                                                                                                                           |                                                                    |                                                   |                      |
| Notes            | <ul style="list-style-type: none"><li>▪ Note that in rifamycin’s two pivotal trials, the comparator was placebo in one and ciprofloxacin in the other. The course of treatment with ciprofloxacin in the pivotal was 3 days, but here we have used more conservative guidelines of 5 to 7 days for cost calculation here.</li><li>▪ Costs as of Date<ul style="list-style-type: none"><li>○ Rifamycin: 01.01.2021</li><li>○ Ciprofloxacin: 07.05.2017</li></ul></li></ul> |                                                                    |                                                   |                      |

5. Omadacycline

|                  | Drug<br>[NDC]                                                                                                                                                                                                                                              | Dosage & Administration                                                                                                                                                                                                                                                                                                                                                                                                                                                                                                                                                                      | Unit Cost (WAC, \$)                                                                                                                                                                                                                                                                                    | Total Cost (WAC, \$)                                                                                                                                                       |
|------------------|------------------------------------------------------------------------------------------------------------------------------------------------------------------------------------------------------------------------------------------------------------|----------------------------------------------------------------------------------------------------------------------------------------------------------------------------------------------------------------------------------------------------------------------------------------------------------------------------------------------------------------------------------------------------------------------------------------------------------------------------------------------------------------------------------------------------------------------------------------------|--------------------------------------------------------------------------------------------------------------------------------------------------------------------------------------------------------------------------------------------------------------------------------------------------------|----------------------------------------------------------------------------------------------------------------------------------------------------------------------------|
| Study Antibiotic | Omadacycline<br>[71715-0001-01, 71715-0002-21]                                                                                                                                                                                                             | [ABSSSI] Loading - 200 mg by IV infusion over 60 min OR 100 mg by IV infusion over 30 minutes twice on Day 1. Maintenance - 100 mg IV infusion over 30 minutes once daily OR 300 mg tablets once daily. Alternative - 450 mg tablet once on Day 1 and 2, and 300 mg tablet once daily thereafter. Total course of treatment 7 – 14 days.<br><br>[CABP] Loading - 200 mg by IV infusion over 60 min OR 100 mg by IV infusion over 30 minutes twice on Day 1. Maintenance - 100 mg IV infusion over 30 minutes once daily OR 300 mg tablets once daily. Total course of treatment 7 – 14 days. | 345.00/100 mg package<br>(Package Size: 100 mg solution)<br><br>216.71/150 mg tablet<br>(Package Size: 6 tablets)                                                                                                                                                                                      | [All Indications, IV Infusion]<br><b>2,760 - 5,175</b>                                                                                                                     |
| Comparator       | ABSSSI: Linezolid<br>[25021-0169-87, 72606-0001-08]<br><br>CABP: Moxifloxacin<br>[67457-0323-25, 65862-0603-30]                                                                                                                                            | [ABSSSI, Linezolid] 600 mg IV infusion OR tablets twice daily for 10 – 14 days<br><br>[CABP, Moxifloxacin] 400 mg moxifloxacin orally OR by IV infusion once daily for 7 – 14 days                                                                                                                                                                                                                                                                                                                                                                                                           | [ABSSSI, Linezolid]<br>0.12/mL<br>(Package Size: 10 units of 300 mL at 600 mg/300 mL)<br><br>3.43/600 mg tablet<br>(Package Size: 30 tablets)<br>---<br>[CABP, Moxifloxacin]<br>0.18/mL<br>(Package Size: 12 units of 250 mL at 400 mg/250 mL)<br><br>2.94/400 mg tablet<br>(Package Size: 30 tablets) | <b>IV: 720.00 – 1,440.00</b><br><b>Oral: 68.60 – 137.20</b><br>[ABSSSI, Linezolid]<br><br><b>IV: 315.00 – 630.00</b><br><b>Oral: 20.58 – 41.16</b><br>[CABP, Moxifloxacin] |
| Cost Factor      | ABSSSI<br>IV Omadacycline: IV Linezolid = <b>3.83 – 3.59</b><br>IV Omadacycline: Oral Linezolid = <b>40.23 – 37.72</b><br><br>CABP<br>IV Omadacycline: IV Moxifloxacin = <b>8.76 – 8.21</b><br>IV Omadacycline: Oral Moxifloxacin = <b>134.11 – 125.73</b> |                                                                                                                                                                                                                                                                                                                                                                                                                                                                                                                                                                                              |                                                                                                                                                                                                                                                                                                        |                                                                                                                                                                            |

|       |                                                                                                                                                                                                                                                                                                                                                                                                                                                                                                                                                                                                                                                                                                                                                                                                                                                                                                                                                                                                                                                                          |
|-------|--------------------------------------------------------------------------------------------------------------------------------------------------------------------------------------------------------------------------------------------------------------------------------------------------------------------------------------------------------------------------------------------------------------------------------------------------------------------------------------------------------------------------------------------------------------------------------------------------------------------------------------------------------------------------------------------------------------------------------------------------------------------------------------------------------------------------------------------------------------------------------------------------------------------------------------------------------------------------------------------------------------------------------------------------------------------------|
| Notes | <ul style="list-style-type: none"><li>▪ The alternative dosage and administration for the ABSSSI indication was not used in total cost calculation. Only the IV administration in maintenance was used in total cost calculation. That is, the oral route was disregarded to simplify cost calculation.</li><li>▪ Note that each study drug may have more than one NDC, not all of which are noted in these tables. The NDC chosen to calculate total cost of a course of treatment is based on the NDC(s) with the lowest unit cost at the time of writing OR NDCs for which cost information was available in the IBM Micromedex Red Book.</li><li>▪ Costs as of Date<ul style="list-style-type: none"><li>○ Omadacycline (IV, 71715-0001-01): 12.10.2018</li><li>○ Omadacycline (tablet, 71715-0002-21): 01.01.2021</li><li>○ Linezolid (IV, 25021-0169-87): 08.01.2019</li><li>○ Linezolid (tablet, 72606-0001-08): 06.05.2020</li><li>○ Moxifloxacin (IV, 67457-0323-25): 10.03.2017</li><li>○ Moxifloxacin (tablet, 65862-0603-30): 05.15.2018</li></ul></li></ul> |
|-------|--------------------------------------------------------------------------------------------------------------------------------------------------------------------------------------------------------------------------------------------------------------------------------------------------------------------------------------------------------------------------------------------------------------------------------------------------------------------------------------------------------------------------------------------------------------------------------------------------------------------------------------------------------------------------------------------------------------------------------------------------------------------------------------------------------------------------------------------------------------------------------------------------------------------------------------------------------------------------------------------------------------------------------------------------------------------------|

## 6. Eravacycline

|                  | Drug<br>[NDC]                                                                                                                                                                                                                                                                                                                                                                                                                                                                                                                                                                                                                                                                                                                                                      | Dosage & Administration                                                     | Unit Cost (WAC, \$)                                         | Total Cost (WAC, \$)                        |
|------------------|--------------------------------------------------------------------------------------------------------------------------------------------------------------------------------------------------------------------------------------------------------------------------------------------------------------------------------------------------------------------------------------------------------------------------------------------------------------------------------------------------------------------------------------------------------------------------------------------------------------------------------------------------------------------------------------------------------------------------------------------------------------------|-----------------------------------------------------------------------------|-------------------------------------------------------------|---------------------------------------------|
| Study Antibiotic | Eravacycline<br>[71773-0050-05]                                                                                                                                                                                                                                                                                                                                                                                                                                                                                                                                                                                                                                                                                                                                    | 1 mg/kg IV infusion over 60 minutes every 12 hours for total of 4 – 14 days | 49.00/50 mg powder for solution<br>(Package Size: 50 mg)    | [75 kg patient]<br><b>588.00 – 2,058.00</b> |
| Comparator       | Ertapenem<br>[55150-0282-09]<br>(Study TP-434-008)                                                                                                                                                                                                                                                                                                                                                                                                                                                                                                                                                                                                                                                                                                                 | 1.0 g IV infusion once daily for 4 to 14 days                               | 100.0000/1 g powder<br>(Package Size: 10 units at 1 g each) | <b>400.00 – 1,400.00</b>                    |
|                  | Meropenem<br>[72572-0415-10]<br>(Study TP-434-025)                                                                                                                                                                                                                                                                                                                                                                                                                                                                                                                                                                                                                                                                                                                 | 1.0 g IV infusion three times daily for 4 to 14 days                        | 7.11000/1 g powder<br>(Package Size: 10 units at 1 g each)  | <b>85.32 – 149.31</b>                       |
| Cost Factor      | Ertapenem: <b>1.47</b><br>Meropenem: <b>6.89, 13.78</b>                                                                                                                                                                                                                                                                                                                                                                                                                                                                                                                                                                                                                                                                                                            |                                                                             |                                                             |                                             |
|                  |                                                                                                                                                                                                                                                                                                                                                                                                                                                                                                                                                                                                                                                                                                                                                                    |                                                                             |                                                             |                                             |
| Notes            | <ul style="list-style-type: none"><li>▪ Note that each study drug may have more than one NDC, not all of which are noted in these tables. The NDC chosen to calculate total cost of a course of treatment is based on the NDC(s) with the lowest unit cost at the time of writing OR NDCs for which cost information was available in the IBM Micromedex Red Book.</li><li>▪ Costs were calculated based for a 75 kg male patient.</li><li>▪ Additional Reference NDCs<ul style="list-style-type: none"><li>○ Ertapenem: 55150-0282-09</li><li>○ Meropenem: 72572-0415-10</li></ul></li><li>▪ Costs as of Date<ul style="list-style-type: none"><li>○ Eravacycline: 05.30.2019</li><li>○ Ertapenem: 05.03.2019</li><li>○ Meropenem: 08.27.2020</li></ul></li></ul> |                                                                             |                                                             |                                             |

## 7. Plazomicin

|                  | Drug<br>[NDC]                                                                                                                                                                                                                                                                                          | Dosage & Administration                                        | Unit Cost (WAC, \$)                                                 | Total Cost (WAC, \$)                      |
|------------------|--------------------------------------------------------------------------------------------------------------------------------------------------------------------------------------------------------------------------------------------------------------------------------------------------------|----------------------------------------------------------------|---------------------------------------------------------------------|-------------------------------------------|
| Study Antibiotic | Plazomicin<br>[71045-0010-02]                                                                                                                                                                                                                                                                          | 15 mg/kg IV infusion over 30 minutes once daily for 4 - 7 days | 31.5000/10 ml vial<br>(Package Size: 10 vials of 10 mL at 50 mg/ml) | [75 kg patient]<br><b>283.50 - 496.13</b> |
| Comparator       | Meropenem<br>[72572-0415-10]                                                                                                                                                                                                                                                                           | 1 g IV infusion three times daily for 4 - 7 days               | 7.11000/1 g powder<br>(Package Size: 10 units at 1 g each)          | <b>85.32 – 149.31</b>                     |
| Cost Factor      | 3.32                                                                                                                                                                                                                                                                                                   |                                                                |                                                                     |                                           |
|                  |                                                                                                                                                                                                                                                                                                        |                                                                |                                                                     |                                           |
| Notes            | <ul style="list-style-type: none"><li>▪ <b>Additional Reference NDCs</b><ul style="list-style-type: none"><li>○ Meropenem: 72572-0415-10</li></ul></li><li>▪ <b>Costs as of Date</b><ul style="list-style-type: none"><li>○ Plazomicin: 07.17.2018</li><li>○ Meropenem: 08.27.2020</li></ul></li></ul> |                                                                |                                                                     |                                           |

## 8. Delafloxacin

|                  | Drug<br>[NDC]                                                                                                                                                                                                                                                                                                                                                                                                               | Dosage & Administration                                                                                              | Unit Cost (WAC, \$)                                                                                                                                                                      | Total Cost (WAC, \$)                                                                                              |
|------------------|-----------------------------------------------------------------------------------------------------------------------------------------------------------------------------------------------------------------------------------------------------------------------------------------------------------------------------------------------------------------------------------------------------------------------------|----------------------------------------------------------------------------------------------------------------------|------------------------------------------------------------------------------------------------------------------------------------------------------------------------------------------|-------------------------------------------------------------------------------------------------------------------|
| Study Antibiotic | Delafloxacin<br>[70842-0102-03,<br>70842-0101-01]                                                                                                                                                                                                                                                                                                                                                                           | 300 mg IV infusion over 60 minutes every 12 hours for 5 – 14 days<br>OR<br>450 mg tablet twice daily for 5 – 14 days | 132.5000/300 mg powder<br>(Package Size: 10 300 mg units)<br><br>74.42/450 mg tablet<br>(Package Size: 20 tablets)                                                                       | IV: <b>1,325 - 3,710</b><br>Oral: <b>744.19 - 2,083.76</b>                                                        |
| Comparator       | Vancomycin<br>[70594-0042-03]<br>&<br>Aztreonam<br>[63323-0401-26]                                                                                                                                                                                                                                                                                                                                                          | 15 mg/kg IV vancomycin & 2 g IV aztreonam, twice daily for 5 – 14 days                                               | [Vancomycin]<br>0.15/1 mL solution<br>(Package Size: 12 units of 200 mL solution at 1 g/200 mL)<br><br>[Aztreonam]<br>27.31000/1 g powder<br>(Package Size: 10 units of 1 g powder each) | [75 kg patient]<br>Vancomycin: 337.50 – 945.00<br>Aztreonam:<br>546.20 – 1,529.36<br><br><b>883.70 – 2,474.36</b> |
| Cost Factor      | IV Delafloxacin: <b>1.50, 1.10</b><br>Oral Delafloxacin: <b>0.84</b>                                                                                                                                                                                                                                                                                                                                                        |                                                                                                                      |                                                                                                                                                                                          |                                                                                                                   |
|                  |                                                                                                                                                                                                                                                                                                                                                                                                                             |                                                                                                                      |                                                                                                                                                                                          |                                                                                                                   |
| Notes            | <ul style="list-style-type: none"><li>▪ <b>Additional Reference NDCs</b><ul style="list-style-type: none"><li>○ Vancomycin: 70594-0042-03</li><li>○ Aztreonam: 63323-0401-26</li></ul></li><li>▪ <b>Costs as of Date</b><ul style="list-style-type: none"><li>○ Delafloxacin IV: 10.20.2017</li><li>○ Delafloxacin tablets: 04.01.2019</li><li>○ Vancomycin: 04.01.2019</li><li>○ Aztreonam: 09.04.2015</li></ul></li></ul> |                                                                                                                      |                                                                                                                                                                                          |                                                                                                                   |

9. Secnidazole

|                  | Drug<br>[NDC]                                                                                                       | Dosage & Administration                                   | Unit Cost (WAC, \$)                                 | Total Cost (WAC, \$) |
|------------------|---------------------------------------------------------------------------------------------------------------------|-----------------------------------------------------------|-----------------------------------------------------|----------------------|
| Study Antibiotic | Secnidazole<br>[27437-0051-01]                                                                                      | 2 grams of granules once orally                           | 282.25/2 g granules<br>(Package Size: 2 g granules) | 282.25               |
| Comparator       | Metronidazole<br>[62332-0016-31]                                                                                    | [Bacterial vaginosis] 750 mg orally once daily for 7 days | 0.28/250 mg tablet<br>(Package Size: 100 tablets)   | 5.88                 |
| Cost Factor      | 48.00                                                                                                               |                                                           |                                                     |                      |
|                  |                                                                                                                     |                                                           |                                                     |                      |
| Notes            | <div>▪ Costs as of Date</div> <div><div>○ Secnidazole: 12.01.2019</div><div>○ Metronidazole: 12.02.2016</div></div> |                                                           |                                                     |                      |

## 10. Meropenem-vaborbactam

|                  | Drug<br>[NDC]                                                                                                                                                                                                                                                                                                                                                                                                                                                                                                                                                                                                                                                                                                      | Dosage & Administration                                            | Unit Cost (WAC, \$)                                                                       | Total Cost (WAC, \$) |
|------------------|--------------------------------------------------------------------------------------------------------------------------------------------------------------------------------------------------------------------------------------------------------------------------------------------------------------------------------------------------------------------------------------------------------------------------------------------------------------------------------------------------------------------------------------------------------------------------------------------------------------------------------------------------------------------------------------------------------------------|--------------------------------------------------------------------|-------------------------------------------------------------------------------------------|----------------------|
| Study Antibiotic | Meropenem-<br>vaborbactam<br>[70842-0120-06]                                                                                                                                                                                                                                                                                                                                                                                                                                                                                                                                                                                                                                                                       | 2 g/2 g IV infusion over 3 hours, every 8 hours, for up to 14 days | 178.200/1 g powder for solution<br>(Package Size: 6 1 g units)                            | 29,937.60            |
| Comparator       | Piperacillin-<br>tazobactam<br>[00206-8862-02]                                                                                                                                                                                                                                                                                                                                                                                                                                                                                                                                                                                                                                                                     | 4 g/0.5 g IV infusion, every 8 hours, for up to 10 days            | 0.25125/mL premix solution<br>(Package Size: 12 units of 100 mL<br>solution at 4 g/0.5 g) | 753.75               |
| Cost Factor      | 39.72                                                                                                                                                                                                                                                                                                                                                                                                                                                                                                                                                                                                                                                                                                              |                                                                    |                                                                                           |                      |
| Notes            | <ul style="list-style-type: none"> <li>▪ Note that the length of treatment in the pivotal trials with meropenem-vaborbactam was up to 10 days. The FDA label indicates a course of treatment up to 14 days, which we have opted to use to calculate cost of treatment here.</li> <li>▪ Optional stepdowns to oral treatment (typically levofloxacin) not included in cost calculation.</li> <li>▪ <b>Additional Reference NDCs</b> <ul style="list-style-type: none"> <li>○ Piperacillin-tazobactam: 00206-8862-02</li> </ul> </li> <li>▪ <b>Costs as of Date</b> <ul style="list-style-type: none"> <li>○ Meropenem-vaborbactam: 04.01.2019</li> <li>○ Piperacillin-tazobactam: 01.01.2021</li> </ul> </li> </ul> |                                                                    |                                                                                           |                      |

## 11. Ozenoxacin

|                  | Drug<br>[NDC]                                                                                                                                                                                                                                              | Dosage & Administration                                                                     | Unit Cost (WAC, \$)                              | Total Cost (WAC, \$)                  |
|------------------|------------------------------------------------------------------------------------------------------------------------------------------------------------------------------------------------------------------------------------------------------------|---------------------------------------------------------------------------------------------|--------------------------------------------------|---------------------------------------|
| Study Antibiotic | Ozenoxacin<br>[70363-0011-30]                                                                                                                                                                                                                              | Apply thin layer to affected area twice daily for up to 5 days<br><br>(Dosage unspecified.) | 9.90/g 1% cream<br>(Package Size: 30 g tube)     | 297.00<br>[One 30 g tube ozenoxacin]  |
| Comparator       | Retapamulin<br>[16110-0518-30]                                                                                                                                                                                                                             | Apply thin layer to the affected area twice a day for 5 days<br><br>(Dosage unspecified.)   | 20.76033/g 1% cream<br>(Package Size: 30 g tube) | 622.81<br>[One 30 g tube retapamulin] |
| Cost Factor      | 0.48                                                                                                                                                                                                                                                       |                                                                                             |                                                  |                                       |
|                  |                                                                                                                                                                                                                                                            |                                                                                             |                                                  |                                       |
| Notes            | <div>▪ Additional Reference NDCs<ul style="list-style-type: none"><li>○ Retapamulin: 16110-0518-30</li></ul></div> <div>▪ Costs as of Date<ul style="list-style-type: none"><li>○ Ozenoxacin: 10.26.2018</li><li>○ Retapamulin: 01.02.2021</li></ul></div> |                                                                                             |                                                  |                                       |

12. Bezlotoxumab

|                  | Drug<br>[NDC]                                                                                                                            | Dosage & Administration                          | Unit Cost (WAC, \$)                           | Total Cost (WAC, \$)        |
|------------------|------------------------------------------------------------------------------------------------------------------------------------------|--------------------------------------------------|-----------------------------------------------|-----------------------------|
| Study Antibiotic | Bezlotoxumab<br>[00006-3025-00]                                                                                                          | One-time IV infusion of 10 mg/kg over 60 minutes | 95.00/mL<br>(Package Size: 40 mL at 25 mg/mL) | 2,850.00<br>[75 kg patient] |
| Comparator       | None available.                                                                                                                          | -                                                | -                                             | -                           |
| Cost Factor      | No calculation possible.                                                                                                                 |                                                  |                                               |                             |
|                  |                                                                                                                                          |                                                  |                                               |                             |
| Notes            | <ul style="list-style-type: none"><li>Costs as of Date<ul style="list-style-type: none"><li>Bezlotoxumab: 12.08.2016</li></ul></li></ul> |                                                  |                                               |                             |

## 13. Amikacin liposome inhalation suspension

|                  | Drug<br>[NDC]                                                                                                                                                                                                                                                                                                                                                                                                                                                                                                                                                                                                                                                                                                                                                                                                                  | Dosage & Administration                                                                                          | Unit Cost (WAC, \$)                                                                                                                                                                                                       | Total Cost (WAC, \$)                                                                                                                                                                          |
|------------------|--------------------------------------------------------------------------------------------------------------------------------------------------------------------------------------------------------------------------------------------------------------------------------------------------------------------------------------------------------------------------------------------------------------------------------------------------------------------------------------------------------------------------------------------------------------------------------------------------------------------------------------------------------------------------------------------------------------------------------------------------------------------------------------------------------------------------------|------------------------------------------------------------------------------------------------------------------|---------------------------------------------------------------------------------------------------------------------------------------------------------------------------------------------------------------------------|-----------------------------------------------------------------------------------------------------------------------------------------------------------------------------------------------|
| Study Antibiotic | Amikacin liposome<br>inhalation suspension<br>[71558-0590-28]                                                                                                                                                                                                                                                                                                                                                                                                                                                                                                                                                                                                                                                                                                                                                                  | Once daily oral inhalation of one 590 mg/8.4 mL vial,<br>for 8 – 16 months                                       | 52.64/mL<br>(Package Size: 28 vials of 8.4 mL<br>at 590 mg/8.4 ml)                                                                                                                                                        | <b>12,380.93</b><br>[28-day supply]<br><br><b>161,394.24 – 215,191.78</b><br>[8 – 16 months]                                                                                                  |
| Comparator       | Rifampin<br>[00904-5282-61]<br><br>Ethambutol<br>[62991-3060-01]<br><br>&<br><br>Azithromycin<br>[00069-3070-30]                                                                                                                                                                                                                                                                                                                                                                                                                                                                                                                                                                                                                                                                                                               | Azithromycin (500 mg), rifampin (600 mg), and<br>ethambutol (25 mg/kg) three times a week, for 8 – 16<br>months. | [Rifampin]<br>1.10550/300 mg capsule<br>(Package Size: 100 capsules)<br><br>[Ethambutol]<br>2.16750/g powder<br>(Package Size: 25,000 grams)<br><br>[Azithromycin]<br>2.94800/500 mg tablet<br>(Package Size: 30 tablets) | [For a 75 kg patient]<br>Rifampin: 2.21/dose<br>Ethambutol: 4.06/dose<br>Azithromycin: 2.95/dose<br><br><b>110.64</b><br>[28-day supply]<br><br><b>1,438.32 – 1,917.76</b><br>[8 – 16 months] |
| Cost Factor      | [28-day supply]<br><b>111.90</b><br><br>[8 -16 months]<br><b>112.21 (across the range)</b>                                                                                                                                                                                                                                                                                                                                                                                                                                                                                                                                                                                                                                                                                                                                     |                                                                                                                  |                                                                                                                                                                                                                           |                                                                                                                                                                                               |
| Notes            | <ul style="list-style-type: none"> <li>▪ Pivotal trials for amikacin sulfate used a background regiment of at least two ATS/IDSA recommended drugs as the comparator. More than half of the comparison group in the pivotal trial were on a rifamycin, ethambutol, and a macrolide. Here we've used azithromycin as the representative macrolide based on IDS guidelines, and rifampin as the representative rifamycin.</li> <li>▪ <b>Additional Reference NDCs</b> <ul style="list-style-type: none"> <li>○ Rifampin: 00904-5282-61</li> <li>○ Ethambutol: 62991-3060-01</li> <li>○ Azithromycin: 00069-3070-30</li> </ul> </li> <li>▪ <b>Costs as of Date</b> <ul style="list-style-type: none"> <li>○ Amikacin sulfate: 01.01.2021</li> <li>○ Rifampin: 01.01.2021</li> <li>○ Ethambutol: 01.01.2013</li> </ul> </li> </ul> |                                                                                                                  |                                                                                                                                                                                                                           |                                                                                                                                                                                               |

|  |                            |
|--|----------------------------|
|  | ○ Azithromycin: 01.01.2021 |
|--|----------------------------|

## 14. Cefiderocol

|                  | Drug<br>[NDC]                                                                                                                                                                                                                                                                                                 | Dosage & Administration                                                  | Unit Cost (WAC, \$)                                                  | Total Cost (WAC, \$) |
|------------------|---------------------------------------------------------------------------------------------------------------------------------------------------------------------------------------------------------------------------------------------------------------------------------------------------------------|--------------------------------------------------------------------------|----------------------------------------------------------------------|----------------------|
| Study Antibiotic | Cefiderocol<br>[59630-0266-10]                                                                                                                                                                                                                                                                                | 2 g IV infusion over 3 hours, every 8 hours, for 7 to 14 days            | 183.33/g powder for solution<br>(Package Size: 10 units of 1 g each) | 7,699.86 – 15,399.72 |
| Comparator       | Imipenem/Cilastatin<br>[00409-3507-10]                                                                                                                                                                                                                                                                        | Imipenem/cilastatin (1 g: 1 g) IV infusion every 8 hours for 7 – 14 days | 9.45/500 mg-500 mg powder for solution<br>(Package Size: 25 units)   | 396.90 – 793.80      |
| Cost Factor      | 19.6, 19.4                                                                                                                                                                                                                                                                                                    |                                                                          |                                                                      |                      |
|                  |                                                                                                                                                                                                                                                                                                               |                                                                          |                                                                      |                      |
| Notes            | <ul style="list-style-type: none"><li>▪ Additional Reference NDCs<ul style="list-style-type: none"><li>○ Imipenem/Cilastatin: 00409-3507-10</li></ul></li><li>▪ Costs as of Date<ul style="list-style-type: none"><li>○ Cefiderocol: 02.24.2020</li><li>○ Imipenem/Cilastatin: 07.01.2013</li></ul></li></ul> |                                                                          |                                                                      |                      |

## 15. Omeprazole magnesium-amoxicillin-rifabutin

|                  | Drug<br>[NDC]                                                                                                                                                                                                                                                                                                                                                                                                                                                                                                                        | Dosage & Administration                                             | Unit Cost (WAC, \$)                                                                                                                             | Total Cost (WAC, \$)                              |
|------------------|--------------------------------------------------------------------------------------------------------------------------------------------------------------------------------------------------------------------------------------------------------------------------------------------------------------------------------------------------------------------------------------------------------------------------------------------------------------------------------------------------------------------------------------|---------------------------------------------------------------------|-------------------------------------------------------------------------------------------------------------------------------------------------|---------------------------------------------------|
| Study Antibiotic | Omeprazole<br>magnesium-<br>amoxicillin-rifabutin<br>[57841-1150-02]                                                                                                                                                                                                                                                                                                                                                                                                                                                                 | 4 capsules every 8 hours for 14 days                                | 3.98/capsule<br>(Package Size: 168 capsules)                                                                                                    | 668.64                                            |
| Comparator       | Amoxicillin<br>[65862-0016-05]<br><br>&<br><br>Omeprazole<br>[62175-0114-37]                                                                                                                                                                                                                                                                                                                                                                                                                                                         | 1000 mg amoxicillin & 10 mg omeprazole every 8<br>hours for 14 days | [Amoxicillin]<br>0.047/250 mg tablet<br>(Package Size: 500 capsules)<br><br>[Omeprazole]<br>0.018/10 mg capsule<br>(Package Size: 100 capsules) | Amoxicillin: 7.90<br>Omeprazole: 0.76<br><br>8.66 |
| Cost Factor      | 77.21                                                                                                                                                                                                                                                                                                                                                                                                                                                                                                                                |                                                                     |                                                                                                                                                 |                                                   |
|                  |                                                                                                                                                                                                                                                                                                                                                                                                                                                                                                                                      |                                                                     |                                                                                                                                                 |                                                   |
| Notes            | <ul style="list-style-type: none"><li>▪ Talicia is available in a combination of 250 mg amoxicillin, 10 mg omeprazole magnesium, and 12.5 mg rifabutin capsules.</li><li>▪ Additional Reference NDCs<ul style="list-style-type: none"><li>○ Amoxicillin: 65862-0016-05</li><li>○ Omeprazole: 62175-0114-37</li></ul></li><li>▪ Costs as of Date<ul style="list-style-type: none"><li>○ Omeprazole magnesium-amoxicillin-rifabutin: 01.01.2021</li><li>○ Amoxicillin: 09.12.2006</li><li>○ Omeprazole: 10.18.2019</li></ul></li></ul> |                                                                     |                                                                                                                                                 |                                                   |
